# Supplementary material
Source: PubMed Central journal article supplement (PMC1421348)

## Supplementary supporting data

Table 1. Differential expression of cytokine and chemokine related genes in the lungs of *nrf2* - deficient and wild-type mice following treatment with LPS.

| Gene title                                                                            | Gene symbol    | 30 min          |                 | 1 h             |                 | 6 h             |                 | 12 h            |                 | 24 h            |                 |
|---------------------------------------------------------------------------------------|----------------|-----------------|-----------------|-----------------|-----------------|-----------------|-----------------|-----------------|-----------------|-----------------|-----------------|
|                                                                                       |                | (LPS / Vehicle) |                 | (LPS / Vehicle) |                 | (LPS / Vehicle) |                 | (LPS / Vehicle) |                 | (LPS / Vehicle) |                 |
|                                                                                       |                | <i>Nrf2</i> -/- | <i>Nrf2</i> +/- |
| Chemokine (C-C motif) ligand 12 (Monocyte chemoattractant protein 5)                  | CCL12 (MCP5)   | 19.7 ± 0.6      | 7.5 ± 0.4       | 27.7 ± 0.6      | 12.5 ± 0.4      | 19.3 ± 0.6      | 8.6 ± 0.4       | 19.6 ± 0.7      | 15.0 ± 0.4      | 29.2 ± 0.7      | 14.9 ± 0.4      |
| Chemokine (C-C motif) ligand 17 (Thymus- and activation-regulated chemokine)          | CCL17 (TARC)   | 4.5 ± 0.4       | 1.8 ± 0.4       | 6.1 ± 0.4       | 4.2 ± 0.4       | 9.1 ± 0.4       | 7.0 ± 0.4       | 7.1 ± 0.4       | 7.1 ± 0.4       | ---             | ---             |
| Chemokine (C-C motif) ligand 2 (Monocyte chemoattractant protein-1)                   | CCL2 (MCP1)    | 6.3 ± 0.5       | ---             | 24.8 ± 0.4      | 20.5 ± 0.6      | 20.4 ± 0.5      | 11.9 ± 0.6      | 6.0 ± 0.6       | 8.8 ± 0.6       | 4.7 ± 0.6       | 5.7 ± 0.5       |
| Chemokine (C-C motif) ligand 20 (Macrophage inflammatory protein 3 alpha)             | CCL20 (MIP3α)  | ---             | ---             | 21.4 ± 0.5      | 32.0 ± 0.7      | ---             | ---             | ---             | ---             | ---             | ---             |
| Chemokine (C-C motif) ligand 3 (Macrophage inflammatory protein 1-alpha)              | CCL3 (MIP1α)   | 40.5 ± 0.9      | 25.3 ± 0.5      | 321.8 ± 0.8     | 501.5 ± 0.5     | 120.3 ± 0.8     | 170.1 ± 0.4     | 39.1 ± 0.8      | 73.5 ± 0.5      | ---             | ---             |
| Chemokine (C-C motif) ligand 4 (Macrophage inflammatory protein 1-beta)               | CCL4 (MIP1β)   | 3.3 ± 0.4       | 1.7 ± 0.4       | 12.8 ± 0.4      | 11.4 ± 0.5      | 8.1 ± 0.5       | 8.2 ± 0.4       | 1.9 ± 0.4       | 2.3 ± 0.4       | ---             | 1.6 ± 0.4       |
| Chemokine (C-C motif) ligand 6                                                        | CCL6           | 2.5 ± 0.4       | ---             | 1.4 ± 0.4       | 1.7 ± 0.4       | 1.6 ± 0.5       | 1.7 ± 0.4       | ---             | ---             | ---             | ---             |
| Chemokine (C-C motif) ligand 8 (Monocyte chemoattractant protein 2)                   | CCL8 (MCP2)    | 2.1 ± 0.5       | ---             | ---             | ---             | ---             | ---             | 1.6 ± 0.4       | ---             | ---             | ---             |
| Chemokine (C-C motif) receptor 7                                                      | CCR7           | ---             | ---             | ---             | ---             | 3.5 ± 0.4       | 2.4 ± 0.5       | 3.1 ± 0.4       | 2.3 ± 0.5       | 1.5 ± 0.4       | ---             |
| Chemokine (C-C motif) receptor-like 2                                                 | CCRL2          | 5.3 ± 0.4       | 3.3 ± 0.4       | 8.7 ± 0.4       | 11.6 ± 0.4      | 3.9 ± 0.4       | 3.7 ± 0.4       | 1.7 ± 0.4       | 1.8 ± 0.4       | ---             | ---             |
| Chemokine (C-X3-C motif) ligand 1                                                     | CX3CL1         | ---             | ---             | 2.8 ± 0.4       | 5.0 ± 0.7       | ---             | ---             | ---             | ---             | ---             | ---             |
| Chemokine (C-X-C motif) ligand 1 (Platelet-derived growth factor-inducible protein)   | CXCL1 (KC)     | 16.0 ± 0.4      | 6.8 ± 0.5       | 34.1 ± 0.4      | 26.0 ± 0.4      | 12.9 ± 0.5      | 9.7 ± 0.4       | 5.3 ± 0.4       | 5.7 ± 0.4       | 1.7 ± 0.5       | 2.0 ± 0.4       |
| Chemokine (C-X-C motif) ligand 10 (Gamma-IP10)                                        | CXCL10 (IP-10) | 14.7 ± .6       | 4.3 ± 0.5       | 40.5 ± 0.5      | 25.8 ± 0.4      | 187.4 ± 0.6     | 112.2 ± 0.4     | 40.2 ± 0.6      | 34.3 ± 0.4      | 5.0 ± 0.7       | 5.6 ± 0.4       |
| Chemokine (C-X-C motif) ligand 11 (Interferon-inducible T-cell alpha chemoattractant) | CXCL11 (ITAC)  | ---             | ---             | 3.9 ± 0.5       | ---             | 177.3 ± 0.5     | 198.1 ± 0.8     | 24.8 ± 0.5      | 41.6 ± 0.9      | ---             | ---             |
| Chemokine (C-X-C motif) ligand 13 (B lymphocyte chemoattractant)                      | CXCL13 (BLC)   | 2.6 ± 0.5       | ---             | ---             | 1.9 ± 0.5       | 8.6 ± 0.5       | 4.9 ± 0.4       | 9.2 ± 0.4       | 8.0 ± 0.5       | 10.6 ± 0.4      | 8.3 ± 0.4       |
| Chemokine (C-X-C motif) ligand 14                                                     | CXCL14         | ---             | ---             | ---             | ---             | 1.5 ± 0.4       | ---             | 2.3 ± 0.5       | ---             | ---             | ---             |
| Chemokine (C-X-C motif) ligand 2 (Macrophage inflammatory protein 2)                  | CXCL2 (MIP2)   | 123.6 ± 0.4     | 56.9 ± 0.4      | 250.7 ± 0.4     | 215.3 ± 0.4     | 76.6 ± 0.5      | 66.7 ± 0.4      | 35.8 ± 0.5      | 28.2 ± 0.5      | 3.9 ± 0.4       | 5.1 ± 0.4       |
| Chemokine (C-X-C motif) ligand 5 (lipopoly-saccharide induced C-X-C chemokine)        | CXCL5 (LIX)    | ---             | ---             | ---             | 3.2 ± 0.7       | 4.1 ± 0.4       | 2.4 ± 0.5       | ---             | ---             | ---             | ---             |

Table 1 Cont'd,

| Gene title                                                           | Gene symbol    | 30 min                     |                            | 1 h                        |                            | 6 h                        |                            | 12 h                       |                            | 24 h                       |                            |
|----------------------------------------------------------------------|----------------|----------------------------|----------------------------|----------------------------|----------------------------|----------------------------|----------------------------|----------------------------|----------------------------|----------------------------|----------------------------|
|                                                                      |                | (LPS / Vehicle)            |                            | (LPS / Vehicle)            |                            | (LPS / Vehicle)            |                            | (LPS / Vehicle)            |                            | (LPS / Vehicle)            |                            |
|                                                                      |                | <i>Nrf2</i> <sup>-/-</sup> | <i>Nrf2</i> <sup>+/+</sup> |
| Chemokine (C-X-C motif) ligand 9 (Gamma interferon induced monokine) | CXCL9 (MIG)    | 14.7 ± 0.5                 | ---                        | 11.7 ± 0.5                 | ---                        | 820.3 ± 0.5                | 576.0 ± 0.5                | 837.5 ± 0.5                | 739.3 ± 0.6                | 116.2 ± 0.7                | 68.6 ± 0.7                 |
| Colony stimulating factor 1 (macrophage)                             | CSF1           | 3.0 ± 0.4                  | 2.2 ± 0.4                  | 8.2 ± 0.4                  | 7.0 ± 0.4                  | 4.9 ± 0.4                  | 4.9 ± 0.4                  | 3.4 ± 0.4                  | 3.9 ± 0.4                  | 1.7 ± 0.4                  | 2.0 ± 0.4                  |
| Colony stimulating factor 2 (granulocyte-macrophage)                 | CSF2           | 6.3 ± 0.8                  | ---                        | 70.5 ± 1.0                 | 49.9 ± 0.5                 | 65.8 ± 0.9                 | 106.9 ± 0.4                | 12.5 ± 1.0                 | 24.3 ± 0.5                 | ---                        | ---                        |
| Colony stimulating factor 3 (granulocyte)                            | CSF3           | ---                        | ---                        | 40.2 ± 0.5                 | 27.5 ± 0.5                 | 39.9 ± 0.6                 | 20.1 ± 0.5                 | 13.2 ± 0.6                 | 10.8 ± 0.5                 | ---                        | ---                        |
| Interferon gamma                                                     | IFNG           | ---                        | ---                        | ---                        | ---                        | 7.5 ± 0.8                  | 5.3 ± 0.9                  | ---                        | ---                        | ---                        | ---                        |
| Interleukin 1 alpha                                                  | IL1 $\alpha$   | 4.9 ± 0.6                  | 2.2 ± 0.4                  | 11.2 ± 0.6                 | 6.2 ± 0.5                  | ---                        | ---                        | ---                        | ---                        | ---                        | ---                        |
| Interleukin 1 beta                                                   | IL1 $\beta$    | 21.0 ± 0.4                 | 17.6 ± 0.4                 | 27.7 ± 0.4                 | 40.8 ± 0.5                 | 13.8 ± 0.4                 | 14.3 ± 0.4                 | 10.6 ± 0.4                 | 11.8 ± 0.4                 | 4.9 ± 0.4                  | 6.7 ± 0.4                  |
| Interleukin 1 family, member 9                                       | IL1F9          | 3.6 ± 0.6                  | 1.8 ± 0.4                  | 25.6 ± 0.4                 | 19.0 ± 0.5                 | 3.8 ± 0.4                  | 3.7 ± 0.5                  | 6.1 ± 0.4                  | 5.9 ± 0.5                  | 1.8 ± 0.4                  | 2.1 ± 0.5                  |
| Interleukin 1 receptor antagonist                                    | IL1RN          | 9.8 ± 0.6                  | 5.0 ± 0.5                  | 34.1 ± 0.4                 | 36.3 ± 0.4                 | 42.8 ± 0.4                 | 38.9 ± 0.4                 | 22.6 ± 0.4                 | 23.3 ± 0.4                 | 5.4 ± 0.5                  | 6.2 ± 0.4                  |
| Interleukin 10                                                       | IL10           | 2.2 ± 0.4                  | ---                        | 2.2 ± 0.5                  | 1.8 ± 0.4                  | 2.7 ± 0.4                  | 2.0 ± 0.4                  | 4.3 ± 0.6                  | 2.6 ± 0.4                  | ---                        | ---                        |
| Interleukin 12b                                                      | IL12 $\beta$   | 1.8 ± 0.4                  | ---                        | 4.4 ± 0.4                  | 3.1 ± 0.4                  | ---                        | ---                        | ---                        | ---                        | ---                        | ---                        |
| Interleukin 15 receptor, alpha chain                                 | IL15R $\alpha$ | ---                        | ---                        | ---                        | ---                        | 4.3 ± 0.4                  | ---                        | 2.5 ± 0.5                  | 1.9 ± 0.4                  | ---                        | ---                        |
| Interleukin 22                                                       | IL22           | ---                        | ---                        | ---                        | ---                        | 3.4 ± 0.8                  | ---                        | ---                        | ---                        | ---                        | ---                        |
| Interleukin 23, alpha subunit p19                                    | IL23p19        | 6.0 ± 0.5                  | ---                        | 8.1 ± 0.5                  | 14.5 ± 0.5                 | ---                        | ---                        | ---                        | ---                        | ---                        | ---                        |
| Interleukin 6                                                        | IL6            | 171.3 ± 0.7                | 36.3 ± 0.9                 | 362.0 ± 0.7                | 176.1 ± 0.9                | 97.7 ± 0.8                 | 38.6 ± 0.9                 | 25.5 ± 0.8                 | 14.5 ± 0.9                 | 5.2 ± 0.7                  | 5.2 ± 0.8                  |
| Suppressor of cytokine signaling 1                                   | SOCS1          | ---                        | ---                        | 1.9 ± 0.5                  | ---                        | 7.9 ± 0.6                  | 7.9 ± 0.6                  | 3.1 ± 0.6                  | 2.2 ± 0.5                  | ---                        | ---                        |
| Suppressor of cytokine signaling 3                                   | SOCS3          | 3.5 ± 0.4                  | 2.5 ± 0.4                  | 8.7 ± 0.4                  | 7.0 ± 0.4                  | 6.5 ± 0.4                  | 5.3 ± 0.4                  | 3.4 ± 0.4                  | 3.1 ± 0.4                  | 1.8 ± 0.4                  | 2.0 ± 0.4                  |
| Tumor necrosis factor                                                | TNF            | 39.4 ± 0.4                 | 21.9 ± 0.5                 | 24.3 ± 0.6                 | 28.6 ± 0.4                 | 29.4 ± 0.4                 | 23.9 ± 0.4                 | 18.3 ± 0.4                 | 19.6 ± 0.4                 | 7.8 ± 0.5                  | ---                        |
| Tumor necrosis factor (ligand) superfamily, member 14                | TNFSF14        | ---                        | ---                        | ---                        | ---                        | 3.4 ± 0.6                  | ---                        | ---                        | ---                        | ---                        | ---                        |
| Tumor necrosis factor (ligand) superfamily, member 9                 | TNFSF9         | 10.8 ± 0.4                 | 5.8 ± 0.5                  | 16.1 ± 0.4                 | 14.4 ± 0.4                 | 2.4 ± 0.4                  | ---                        | ---                        | ---                        | ---                        | ---                        |

Values are mean fold change ± SE; ---, No change or less than 1.5 fold.

Table 2. Differential expression of transcripts for cell surface adhesion molecules and receptors associated with inflammation in the lungs of *nrf2* -deficient and wild-type mice following treatment with LPS.

| Gene title                                       | Gene symbol | 30 min          |                 | 1 h             |                 | 6 h             |                 | 12 h            |                 | 24 h            |                 |
|--------------------------------------------------|-------------|-----------------|-----------------|-----------------|-----------------|-----------------|-----------------|-----------------|-----------------|-----------------|-----------------|
|                                                  |             | (LPS / Vehicle) |                 | (LPS / Vehicle) |                 | (LPS / Vehicle) |                 | (LPS / Vehicle) |                 | (LPS / Vehicle) |                 |
|                                                  |             | <i>Nrf2</i> -/- | <i>Nrf2</i> +/+ |
| CD14 antigen                                     | CD14        | 9.6 ± 0.4       | 3.7 ± 0.5       | 20.3 ± 0.4      | 14.6 ± 0.4      | 10.9 ± 0.4      | 7.7 ± 0.4       | 8.6 ± 0.4       | 5.9 ± 0.4       | 3.4 ± 0.4       | 3.4 ± 0.4       |
| C-type lectin domain family 4, member d          | CLEC4D      | 8.9 ± 0.5       | 3.6 ± 0.5       | 33.6 ± 0.4      | 28.2 ± 0.4      | 6.6 ± 0.4       | 5.9 ± 0.4       | 7 ± 0.4         | 5.7 ± 0.4       | 2.9 ± 0.4       | 3.5 ± 0.4       |
| C-type lectin domain family 4, member e          | CLEC4E      | 34.8 ± 0.5      | 15.9 ± 0.5      | 111.4 ± 0.4     | 93.1 ± 0.5      | 11.2 ± 0.4      | 9.3 ± 0.5       | 13.9 ± 0.4      | 11.2 ± 0.5      | 6.2 ± 0.4       | 8.5 ± 0.5       |
| Complement component 5, receptor 1               | C5R1        | 3.4 ± 0.5       | ---             | 7.8 ± 0.4       | 9.1 ± 0.4       | 5.4 ± 0.4       | 4.1 ± 0.4       | 5.4 ± 0.4       | 4.8 ± 0.4       | 3.2 ± 0.4       | 2.8 ± 0.4       |
| Peptidoglycan recognition protein 1              | PGLYRP1     | 2.1 ± 0.4       | ---             | 7.9 ± 0.4       | 4.0 ± 0.5       | 4.8 ± 0.4       | 2.4 ± 0.5       | 6.6 ± 0.4       | 3.9 ± 0.5       | 4.2 ± 0.4       | 2.5 ± 0.5       |
| Selectin, endothelial cell                       | SELE        | 37.8 ± 0.5      | 15.2 ± 0.5      | 69.6 ± 0.5      | 67.2 ± 0.5      | 4.7 ± 0.5       | 5.4 ± 0.5       | 3.8 ± 0.6       | 6.2 ± 0.5       | ---             | ---             |
| Selectin, platelet                               | SELP        | ---             | ---             | 44.6 ± 0.7      | 17.4 ± 0.5      | 49.5 ± 0.7      | 26.2 ± 0.4      | 15.1 ± 0.9      | 10.6 ± 0.4      | ---             | 3.2 ± 0.5       |
| Toll-like receptor 2                             | TLR2        | 4.2 ± 0.5       | 2.4 ± 0.4       | 11.6 ± 0.4      | 12.3 ± 0.4      | 7.0 ± 0.4       | 6.0 ± 0.4       | 3.3 ± 0.5       | 3.6 ± 0.4       | 2.0 ± 0.4       | 1.9 ± 0.4       |
| Triggering receptor expressed on myeloid cells 1 | TREM1       | 18.0 ± 0.6      | 4.7 ± 0.7       | 151.2 ± 0.4     | 121.9 ± 0.7     | 51.3 ± 0.4      | 45.6 ± 0.6      | 42.5 ± 0.4      | 19.7 ± 0.6      | 8.5 ± 0.5       | 2.9 ± 0.7       |
| Triggering receptor expressed on myeloid cells 3 | TREM3       | 3.9 ± 0.7       | ---             | 44.3 ± 0.6      | 52.7 ± 0.8      | 17.4 ± 0.7      | 27.1 ± 0.8      | 13.1 ± 0.7      | 17.9 ± 0.8      | 13.3 ± 0.6      | 17.8 ± 0.8      |
| Urokinase plasminogen activator receptor         | PLAUR       | 6.1 ± 0.4       | 3.2 ± 0.4       | 7.2 ± 0.4       | 6.0 ± 0.4       | 4.8 ± 0.4       | 4.3 ± 0.4       | 3.1 ± 0.4       | 2.7 ± 0.4       | 1.8 ± 0.4       | 1.6 ± 0.4       |
| Vascular cell adhesion molecule 1                | VCAM1       | 3.0 ± 0.4       | 1.9 ± 0.4       | 5.0 ± 0.4       | 4.9 ± 0.4       | 3.8 ± 0.4       | 3.2 ± 0.4       | 1.5 ± 0.4       | 1.9 ± 0.4       | ---             | ---             |

Values are mean fold change ± SE; ---, No change or less than 1.5 fold.

Table 3. Differential expression of genes associated with transcriptional regulation of inflammatory molecules in the lungs of *nrf2*-deficient and wild-type mice following treatment with LPS.

| Gene title                                                                            | Gene symbol | 30 min          |                 | 1 h             |                 | 6 h             |                 | 12 h            |                 | 24 h            |                 |
|---------------------------------------------------------------------------------------|-------------|-----------------|-----------------|-----------------|-----------------|-----------------|-----------------|-----------------|-----------------|-----------------|-----------------|
|                                                                                       |             | (LPS / Vehicle) |                 | (LPS / Vehicle) |                 | (LPS / Vehicle) |                 | (LPS / Vehicle) |                 | (LPS / Vehicle) |                 |
|                                                                                       |             | <i>Nrf2</i> -/- | <i>Nrf2</i> +/+ |
| <b>Stat</b>                                                                           |             |                 |                 |                 |                 |                 |                 |                 |                 |                 |                 |
| Signal transducer and activator of transcription 4                                    | STAT4       | 6.8 ± 1.0       | ---             | 5.1 ± 0.9       | ---             | ---             | ---             | ---             | ---             | ---             | ---             |
| <b>NF-κB related</b>                                                                  |             |                 |                 |                 |                 |                 |                 |                 |                 |                 |                 |
| Ankyrin repeat domain 22                                                              | ANKRD22     | ---             | ---             | 34.1 ± 0.7      | 11.6 ± 0.4      | ---             | ---             | ---             | ---             | ---             | ---             |
| Avian reticulo-endotheliosis viral (v-rel) oncogene related B                         | RELB        | 2.5 ± 0.4       | 1.5 ± 0.4       | 6.6 ± 0.4       | 4.3 ± 0.4       | 4.3 ± 0.4       | 3.2 ± 0.4       | 2.9 ± 0.4       | 2.6 ± 0.4       | 2.0 ± 0.4       | 1.8 ± 0.4       |
| Reticuloendotheliosis oncogene                                                        | C-REL       | 3.5 ± 0.4       | 2.2 ± 0.4       | 7.3 ± 0.4       | 7.1 ± 0.4       | ---             | ---             | ---             | ---             | ---             | ---             |
| B-cell leukemia/lymphoma 3                                                            | BCL3        | 3.0 ± 0.4       | 1.8 ± 0.4       | 8.5 ± 0.4       | 6.5 ± 0.4       | 9.1 ± 0.4       | 8.4 ± 0.4       | 3.5 ± 0.4       | 3.4 ± 0.4       | 1.6 ± 0.5       | 2.0 ± 0.4       |
| CAMP responsive element binding protein 5                                             | CREB5       | 2.5 ± 0.4       | ---             | ---             | ---             | ---             | ---             | ---             | ---             | ---             | ---             |
| CCAAT/enhancer binding protein (C/EBP), beta                                          | CEBPB       | 4.9 ± 0.4       | 3.1 ± 0.4       | 6.4 ± 0.4       | 5.8 ± 0.4       | 5.6 ± 0.4       | 4.6 ± 0.4       | 4.4 ± 0.4       | 3.4 ± 0.4       | 2.4 ± 0.4       | 2.2 ± 0.4       |
| Inhibitor of kappa b kinase epsilon                                                   | IKBKE       | ---             | ---             | 11.0 ± 0.5      | 4.5 ± 0.6       | 17.1 ± 0.5      | 11.0 ± 0.4      | 21.9 ± 0.5      | 17.1 ± 0.4      | 6.9 ± 0.5       | 6.8 ± 0.4       |
| Interleukin-1 receptor-associated kinase 3                                            | IRAK3       | ---             | ---             | 7.2 ± 0.4       | 4.0 ± 0.4       | 8.3 ± 0.4       | 5.9 ± 0.4       | 6.9 ± 0.4       | 6.0 ± 0.4       | 3.6 ± 0.4       | 3.6 ± 0.4       |
| Max dimerization protein                                                              | MAD         | 5.5 ± 0.6       | 3.5 ± 0.4       | 17.3 ± 0.4      | 18.6 ± 0.4      | 13.1 ± 0.4      | 12.9 ± 0.4      | 7.2 ± 0.4       | 6.7 ± 0.5       | 1.8 ± 0.4       | 2.3 ± 0.4       |
| Nuclear factor of kappa light polypeptide gene enhancer in B-cells inhibitor, zeta    | NFKBIZ      | 20.5 ± 0.4      | 16.7 ± 0.4      | 22.5 ± 0.4      | 32.7 ± 0.3      | 6.0 ± 0.4       | 7.7 ± 0.4       | 4.2 ± 0.4       | 5.2 ± 0.4       | 1.9 ± 0.4       | 2.3 ± 0.4       |
| Nuclear factor of kappa light polypeptide gene enhancer in B-cells 2, p49/p100        | NFKB2       | 2.5 ± 0.4       | 2.2 ± 0.4       | 7.7 ± 0.4       | 4.9 ± 0.4       | 3.5 ± 0.4       | 2.8 ± 0.4       | 2.5 ± 0.4       | 2.3 ± 0.4       | 1.7 ± 0.4       | 1.8 ± 0.4       |
| Nuclear factor of kappa light polypeptide gene enhancer in B-cells inhibitor, epsilon | NFKBIE      | 3.2 ± 0.4       | 1.8 ± 0.4       | 5.9 ± 0.4       | 5.7 ± 0.4       | 3.7 ± 0.4       | 3.2 ± 0.4       | 2.8 ± 0.4       | 2.5 ± 0.4       | 1.7 ± 0.4       | 1.8 ± 0.4       |
| TRAF family member-associated NF-kappa B activator                                    | TANK        | 2.6 ± 0.4       | 1.9 ± 0.4       | 4.3 ± 0.4       | 5.7 ± 0.4       | ---             | ---             | ---             | ---             | ---             | ---             |
| <b>Interferon related</b>                                                             |             |                 |                 |                 |                 |                 |                 |                 |                 |                 |                 |
| Interferon activated gene 202B                                                        | IFI202B     | 2.5 ± 0.4       | ---             | 3.5 ± 0.5       | 1.9 ± 0.5       | 39.4 ± 0.4      | 21.0 ± 0.4      | 14.9 ± 0.4      | 8.7 ± 0.4       | 6.5 ± 0.4       | 4.8 ± 0.4       |
| Interferon activated gene 204                                                         | IFI204      | 4.3 ± 0.4       | ---             | 4.8 ± 0.7       | 1.9 ± 0.5       | 31.8 ± 0.4      | 29.9 ± 0.4      | 12 ± 0.5        | 9.4 ± 0.4       | 7.1 ± 0.5       | 3.7 ± 0.4       |

Table 3 Cont'd

| Gene title                                                                | Gene symbol | 30 min          |                 | 1 h             |                 | 6 h             |                 | 12 h            |                 | 24 h            |                 |
|---------------------------------------------------------------------------|-------------|-----------------|-----------------|-----------------|-----------------|-----------------|-----------------|-----------------|-----------------|-----------------|-----------------|
|                                                                           |             | (LPS / Vehicle) |                 | (LPS / Vehicle) |                 | (LPS / Vehicle) |                 | (LPS / Vehicle) |                 | LPS / Vehicle   |                 |
|                                                                           |             | <i>Nrf2</i> -/- | <i>Nrf2</i> +/- |
| Interferon regulatory factor 1                                            | IRF1        | 5.7 ± 0.4       | 4.2 ± 0.4       | 4.5 ± 0.4       | 3.7 ± 0.4       | 4.9 ± 0.4       | 4.5 ± 0.4       | 2.5 ± 0.4       | 2.4 ± 0.4       | ---             | ---             |
| Interferon regulatory factor 5                                            | IRF5        | 1.7 ± 0.4       | ---             | 2.4 ± 0.4       | 1.7 ± 0.4       | 3.8 ± 0.4       | 3.1 ± 0.4       | 2.5 ± 0.4       | 2.2 ± 0.4       | 2.2 ± 0.4       | 2.1 ± 0.4       |
| Interferon regulatory factor 7                                            | IRF7        | ---             | ---             | 1.9 ± 0.4       | ---             | 22.6 ± 0.4      | 15.6 ± 0.4      | 16.3 ± 0.4      | 13.1 ± 0.4      | 7.7 ± 0.5       | 6.0 ± 0.4       |
| Interferon-induced protein 44                                             | IFI44       | ---             | ---             | ---             | ---             | 17.9 ± 0.4      | 10.6 ± 0.4      | 6.6 ± 0.4       | 5.5 ± 0.4       | 3.1 ± 0.4       | 1.8 ± 0.4       |
| Interferon-induced protein with tetra-tricopeptide repeats 2 (ISG54)      | IFIT2       | ---             | ---             | ---             | ---             | 39.9 ± 0.4      | 23.1 ± 0.4      | 11.8 ± 0.6      | 8.2 ± 0.5       | 2.5 ± 0.5       | 2.1 ± 0.4       |
| Interferon-induced protein with tetra-tricopeptide repeats 3 (GARG-49)    | IFIT3       | ---             | ---             | ---             | ---             | 18.4 ± 0.4      | 9.9 ± 0.4       | 6.3 ± 0.4       | 5.8 ± 0.4       | 2.9 ± 0.5       | 2.4 ± 0.4       |
| Myxovirus (influenza virus) resistance 1                                  | Mx1         | ---             | ---             | ---             | 2.1 ± 0.5       | 49.9 ± 0.4      | 23.8 ± 0.4      | 6.9 ± 0.7       | 4.7 ± 0.4       | 2.1 ± 0.4       | 1.9 ± 0.5       |
| <b>Stat</b>                                                               |             |                 |                 |                 |                 |                 |                 |                 |                 |                 |                 |
| Signal transducer and activator of transcription 4                        | STAT4       | 6.8 ± 1.0       | ---             | 5.1 ± 0.9       | ---             | ---             | ---             | ---             | ---             | ---             | ---             |
| <b>Other transcription factors</b>                                        |             |                 |                 |                 |                 |                 |                 |                 |                 |                 |                 |
| Early growth response 2                                                   | EGR2        | 8.5 ± 0.4       | 6.5 ± 0.4       | 6.1 ± 0.4       | 5.6 ± 0.4       | ---             | ---             | ---             | ---             | ---             | ---             |
| Early growth response 3                                                   | EGR3        | 84.4 ± 0.4      | 71.0 ± 0.4      | 44 ± 0.4        | 67.6 ± 0.4      | ---             | ---             | ---             | ---             | ---             | ---             |
| Spi-C transcription factor (Spi-1/PU.1 related)                           | SPIC        | ---             | ---             | ---             | ---             | 31.8 ± 1.0      | 19.2 ± 0.6      | 20.0 ± 0.8      | 21.4 ± 0.5      | 35.0 ± 0.8      | 35.0 ± 0.5      |
| TGFB-induced factor 2                                                     | TGIF2       | 8.1 ± 0.4       | 4.1 ± 0.8       | 7.0 ± 0.5       | 10.9 ± 0.5      | ---             | ---             | ---             | ---             | ---             | ---             |
| Transcription factor E3                                                   | TCFE3       | 1.4 ± 0.4       | ---             | 2.1 ± 0.3       | ---             | ---             | ---             | ---             | ---             | ---             | ---             |
| Transforming growth factor, beta induced                                  | TGFBI       | 1.5 ± 0.4       | ---             | 1.5 ± 0.4       | 1.5 ± 0.4       | 2.1 ± 0.4       | 2.4 ± 0.4       | 2.8 ± 0.4       | 2.5 ± 0.4       | 3.1 ± 0.4       | 3.3 ± 0.4       |
| V-maf musculo-aponeurotic fibrosarcoma oncogene family, protein F (avian) | MAFF        | 5.5 ± 0.4       | 3.5 ± 0.4       | 8.5 ± 0.4       | 7.0 ± 0.4       | 6.1 ± 0.4       | 5.4 ± 0.4       | 5.1 ± 0.4       | 4.0 ± 0.4       | ---             | ---             |

Values are mean fold change ± SE; ---, No change or less than 1.5 fold.

Table 4. Differential expression of members of immunoglobulin and MHC class II family in the lungs of *nrf2* -deficient and wild-type mice 30 min after LPS challenge.

| Gene name                                         | Gene symbol    | <i>Nrf2</i> <sup>-/-</sup> ,<br>LPS /<br>Vehicle | <i>Nrf2</i> <sup>+/+</sup> ,<br>LPS /<br>Vehicle |
|---------------------------------------------------|----------------|--------------------------------------------------|--------------------------------------------------|
| Histocompatibility 2, class II antigen A, alpha   | H2-A $\alpha$  | 1.6 $\pm$ 0.4                                    | ---                                              |
| Histocompatibility 2, class II antigen A, beta 1  | H2-A $\beta$ 1 | 2.0 $\pm$ 0.4                                    | ---                                              |
| Histocompatibility 2, class II antigen E alpha    | H2-E $\alpha$  | 5.1 $\pm$ 0.7                                    | ---                                              |
| Histocompatibility 2, class II, locus dma         | H2-DMA         | 2.3 $\pm$ 0.4                                    | ---                                              |
| Histocompatibility 2, class II, locus Mb1         | H2-DMB1        | 2.3 $\pm$ 0.4                                    | ---                                              |
| Histocompatibility 2, class II, locus Mb2         | H2-DMB2        | 1.6 $\pm$ 0.4                                    | ---                                              |
| Immunoglobulin heavy chain (gamma polypeptide)    | IGH $\gamma$   | 12.9 $\pm$ 0.7                                   | ---                                              |
| Immunoglobulin heavy chain (J558 family)          | IGH-VJ558      | 4.7 $\pm$ 0.4                                    | ---                                              |
| Immunoglobulin heavy chain 4 (serum igg1)         | IGH-4          | 38.9 $\pm$ 1.0                                   | ---                                              |
| Immunoglobulin heavy chain 6 (heavy chain of igm) | IGH-6          | 29.7 $\pm$ 0.8                                   | 2.1 $\pm$ 0.4                                    |
| Immunoglobulin joining chain                      | IGJ            | 7.5 $\pm$ 0.5                                    | ---                                              |
| Immunoglobulin kappa chain variable 21 (V21)      | IGK-V21        | 9.9 $\pm$ 0.6                                    | ---                                              |
| Immunoglobulin kappa chain variable 32 (V32)      | IGK-V32        | 13.9 $\pm$ 0.9                                   | ---                                              |
| Immunoglobulin kappa chain variable 8 (V8)        | IGK-V8         | 4.1 $\pm$ 0.4                                    | ---                                              |
| Immunoglobulin lambda chain, variable 1           | IGL-V1         | 3.7 $\pm$ 0.7                                    | ---                                              |
| Immunoglobulin superfamily, member 6              | IGSF6          | 10.3 $\pm$ 0.5                                   | 4.3 $\pm$ 0.5                                    |
| Ig kappa chain                                    | IGM            | 6.7 $\pm$ 0.5                                    | ---                                              |

Values are mean fold change  $\pm$  SE; ---, No change or less than 1.5 fold.

Table 5. Differential expression of genes encoding acute phase proteins in the lungs of *nrf2*-deficient and wild-type mice following treatment with LPS.

| Gene title                                                    | Gene symbol | 30 min          |                 | 1 h             |                 | 6 h             |                 | 12 h            |                 | 24 h            |                 |
|---------------------------------------------------------------|-------------|-----------------|-----------------|-----------------|-----------------|-----------------|-----------------|-----------------|-----------------|-----------------|-----------------|
|                                                               |             | (LPS / Vehicle) |                 | (LPS / Vehicle) |                 | (LPS / Vehicle) |                 | (LPS / Vehicle) |                 | (LPS / Vehicle) |                 |
|                                                               |             | <i>Nrf2</i> -/- | <i>Nrf2</i> +/+ |
| Heat shock protein 1A                                         | HSPA1A      | 30.1 ± 0.4      | 23.3 ± 0.5      | 2.8 ± 0.5       | 1.5 ± 0.4       | ---             | ---             | ---             | ---             | ---             | 1.7 ± 0.4       |
| Heat shock protein 8                                          | HSPA8       | 2.1 ± 0.4       | 4.3 ± 0.5       | 1.5 ± 0.4       | ---             | ---             | ---             | ---             | ---             | 1.7 ± 0.4       | 2.4 ± 0.4       |
| Metallothionein 2                                             | MT2         | 1.8 ± 0.5       | ---             | 5.6 ± 0.5       | 3.6 ± 0.4       | 8.5 ± 0.5       | 6.2 ± 0.4       | 7.5 ± 0.5       | 5.2 ± 0.4       | 2.0 ± 0.6       | 1.6 ± 0.4       |
| Orosomucoid 1                                                 | ORM1        | ---             | ---             | 1.6 ± 0.5       | ---             | 22.9 ± 0.4      | 14.8 ± 0.7      | 21.1 ± 0.5      | 12.0 ± 0.7      | 3.1 ± 0.6       | 5.1 ± 0.7       |
| Orosomucoid 2                                                 | ORM2        | ---             | ---             | ---             | ---             | 6.0 ± 0.4       | 3.8 ± 0.6       | 7.2 ± 0.5       | 3.8 ± 0.5       | 3.5 ± 0.5       | 3.3 ± 0.5       |
| Serine (or cysteine) proteinase inhibitor, clade A, member 1a | SERPINA1A   | ---             | ---             | ---             | ---             | ---             | ---             | ---             | 43.1 ± 0.5      | ---             | ---             |
| Serine (or cysteine) proteinase inhibitor, clade A, member 3C | SERPINA3C   | ---             | ---             | 1.8 ± 0.5       | ---             | 6.7 ± 0.4       | 8.2 ± 0.5       | 3.6 ± 0.7       | 3.3 ± 0.5       | ---             | 1.6 ± 0.4       |
| Serine (or cysteine) proteinase inhibitor, clade A, member 3G | SERPINA3G   | 1.9 ± 0.5       | ---             | 3.2 ± 0.5       | 1.5 ± 0.4       | 14.7 ± 0.4      | 9.4 ± 0.4       | 10.1 ± 0.4      | 7.0 ± 0.4       | 2.6 ± 0.5       | ---             |
| Serine (or cysteine) proteinase inhibitor, clade A, member 3M | SERPINA3M   | ---             | ---             | ---             | ---             | 8.0 ± 0.4       | 5.7 ± 0.4       | 10.9 ± 0.5      | 3.5 ± 0.4       | 3.2 ± 0.5       | 2.0 ± 0.4       |
| Serine (or cysteine) proteinase inhibitor, clade A, member 3N | SERPINA3N   | ---             | ---             | 4.2 ± 0.6       | 3.7 ± 0.6       | 11.2 ± 0.5      | 31.3 ± 0.4      | 12.5 ± 0.5      | 30.7 ± 0.4      | 6.7 ± 0.5       | 16.3 ± 0.4      |
| Serine (or cysteine) proteinase inhibitor, clade B, member 2  | SERPINB2    | 14.3 ± 0.6      | ---             | 18.5 ± 0.5      | 10.1 ± 0.6      | 5.0 ± 0.6       | 2.1 ± 0.5       | 3.9 ± 0.7       | ---             | 2.9 ± 0.6       | ---             |
| Serine (or cysteine) proteinase inhibitor, clade E, member 1  | SERPINE1    | 10.9 ± 0.4      | 8.1 ± 0.4       | 32.4 ± 0.4      | 24.3 ± 0.4      | 23.8 ± 0.4      | 23.8 ± 0.4      | 9.3 ± 0.5       | 15.7 ± 0.4      | 2.3 ± 0.5       | 3.8 ± 0.5       |
| Serum amyloid A 1                                             | SAA1        | ---             | ---             | 3.1 ± 0.5       | ---             | 93.1 ± 0.4      | 95.7 ± 0.5      | 66.3 ± 0.4      | 76.6 ± 0.5      | 23.4 ± 0.4      | 32.7 ± 0.5      |
| Serum amyloid A 2                                             | SAA2        | ---             | ---             | ---             | ---             | 28.1 ± 0.4      | 19.8 ± 0.4      | 16.2 ± 0.4      | 12.5 ± 0.4      | 5.1 ± 0.5       | ---             |
| Serum amyloid A 3                                             | SAA3        | 3.0 ± 0.5       | ---             | 18.0 ± 0.4      | 4.0 ± 0.9       | 85.6 ± 0.4      | 25.5 ± 0.8      | 90.5 ± 0.5      | 24.9 ± 0.8      | 61.0 ± 0.4      | 22 ± 0.8        |

Values are mean fold change ± SE; ---, No change or less than 1.5 fold.

Table 6. Differential expression of selected genes that modulate inflammation in the lungs of *nrf2* -deficient and wild-type mice following treatment with LPS.

| Gene title                                     | Gene symbol | 30 min          |                 | 1 h             |                 | 6 h             |                 | 12 h            |                 | 24 h            |                 |
|------------------------------------------------|-------------|-----------------|-----------------|-----------------|-----------------|-----------------|-----------------|-----------------|-----------------|-----------------|-----------------|
|                                                |             | (LPS / Vehicle) |                 | (LPS / Vehicle) |                 | (LPS / Vehicle) |                 | (LPS / Vehicle) |                 | (LPS / Vehicle) |                 |
|                                                |             | <i>Nrf2</i> -/- | <i>Nrf2</i> +/+ |
| Arginase II                                    | ARG2        | 4.1 ± 0.4       | 1.8 ± 0.4       | 7.0 ± 0.4       | 7.5 ± 0.4       | 7.0 ± 0.4       | 5.2 ± 0.4       | 4.6 ± 0.4       | 2.9 ± 0.4       | 1.8 ± 0.4       | 1.5 ± 0.4       |
| Immune-responsive gene 1                       | IRG1        | 286.0 ± 0.6     | 29.0 ± 0.8      | 1858.0 ± 0.4    | 1082.0 ± 0.4    | 552.0 ± 0.4     | 304.0 ± 0.5     | 313.0 ± 0.4     | 183.5 ± 0.7     | 53.0 ± 0.4      | 64.1 ± 0.5      |
| Indoleamine-pyrrole 2,3 dioxygenase            | INDO        | 2.2 ± 0.5       | ---             | ---             | ---             | 25.6 ± 0.6      | 19.8 ± 0.5      | 9.3 ± 0.5       | 8.5 ± 0.6       | ---             | ---             |
| Neutrophil cytosolic factor 1                  | NCF1        | 4.9 ± 0.5       | 2.0 ± 0.4       | 16.3 ± 0.4      | 13.5 ± 0.4      | 5.8 ± 0.4       | 4.3 ± 0.4       | 6.6 ± 0.4       | 4.7 ± 0.4       | 2.8 ± 0.4       | 2.4 ± 0.4       |
| Neutrophil cytosolic factor 4                  | NCF4        | 2.7 ± 0.4       | ---             | 5.7 ± 0.4       | 4.7 ± 0.4       | 5 ± 0.3         | 4.1 ± 0.4       | 6.2 ± 0.3       | 4.8 ± 0.4       | 4.0 ± 0.4       | 3.9 ± 0.4       |
| Nitric oxide synthase 2, inducible, macrophage | NOS2        | ---             | ---             | ---             | ---             | 14.7 ± 0.5      | 7.9 ± 0.6       | ---             | ---             | ---             | ---             |
| Pleckstrin                                     | PLEK        | 4.3 ± 0.4       | 2.5 ± 0.4       | 9.6 ± 0.4       | 10.3 ± 0.4      | 3.3 ± 0.4       | 3.1 ± 0.4       | 2.2 ± 0.4       | 2.4 ± 0.4       | 2.0 ± 0.4       | 2.1 ± 0.4       |
| Properdin factor, complement                   | PFC         | 2.6 ± 0.5       | ---             | 2.6 ± 0.5       | 2.4 ± 0.4       | 3.0 ± 0.5       | 2.3 ± 0.4       | 3.6 ± 0.5       | 2.5 ± 0.4       | 5.5 ± 0.5       | 3.8 ± 0.4       |

Values are mean fold change ± SE; ---, No change or less than 1.5 fold.



Table 7. Antioxidative genes that are constitutively elevated in the lungs of wild-type compared to *nrf2* -deficient mice.

| Gene name (Gene symbol)                             | Vehicle,<br><i>Nrf2</i> +/+ //<br><i>Nrf2</i> -/- | LPS, <i>Nrf2</i> +/+ // <i>Nrf2</i> -/- |           |           |           |           |
|-----------------------------------------------------|---------------------------------------------------|-----------------------------------------|-----------|-----------|-----------|-----------|
|                                                     |                                                   | 30 min                                  | 1 h       | 6 h       | 12 h      | 24 h      |
| Glutamate-cysteine ligase, catalytic subunit (GCLC) | 2.1 ± 0.4                                         | ---                                     | 1.9 ± 0.4 | 1.7 ± 0.5 | 1.6 ± 0.4 | 2.1 ± 0.4 |
| Glutathione peroxidase 2 (GPX2)                     | 5.3 ± 0.5                                         | 4.8 ± 0.5                               | 4.4 ± 0.5 | 3.4 ± 0.6 | 2.3 ± 0.5 | 4.0 ± 0.7 |
| Glutathione S-transferase, alpha 3 (GSTA3)          | 2.6 ± 0.4                                         | 3.3 ± 0.4                               | 2.5 ± 0.4 | 2.7 ± 0.5 | 4.0 ± 0.5 | 2.4 ± 0.4 |
| Glutathione S-transferase, alpha 4 (GSTA4)          | 1.7 ± 0.4                                         | ---                                     | 1.5 ± 0.4 | ---       | ---       | ---       |
| Glutathione S-transferase, mu 1 (GSTM1)             | 2.4 ± 0.4                                         | 2.6 ± 0.4                               | 2.4 ± 0.3 | 1.9 ± 0.4 | 1.7 ± 0.4 | 1.5 ± 0.4 |
| Glutathione S-transferase, mu 2 (GSTM2)             | 1.6 ± 0.4                                         | 1.9 ± 0.3                               | 1.6 ± 0.3 | ---       | 1.5 ± 0.4 | ---       |
| Malic enzyme, supernatant (MOD1)                    | 1.9 ± 0.8                                         | 1.9 ± 0.3                               | 1.8 ± 0.4 | 1.5 ± 0.4 | 1.5 ± 0.4 | 1.6 ± 0.4 |
| Catalase (CAT)                                      | ---                                               | ---                                     | ---       | ---       | ---       | 3.3 ± 0.5 |
| Thioredoxin reductase 1 (TXNRD1)                    | 1.8 ± 0.4                                         | ---                                     | ---       | ---       | ---       | ---       |

Values are mean fold change ± SE; ---, No change or less than 1.5 fold.

Table 8. Validation by real time-PCR of selected LPS inducible genes identified by microarray analysis in the lungs of mice of both genotypes challenged with LPS.

| Gene symbol   | <i>Nrf2</i> <sup>-/-</sup> , LPS / Vehicle |             |               |             |               |             |               |             |               |             | <i>Nrf2</i> <sup>+/+</sup> , LPS / Vehicle |             |               |             |               |             |               |             |               |             |
|---------------|--------------------------------------------|-------------|---------------|-------------|---------------|-------------|---------------|-------------|---------------|-------------|--------------------------------------------|-------------|---------------|-------------|---------------|-------------|---------------|-------------|---------------|-------------|
|               | 30 min                                     |             | 1 h           |             | 6 h           |             | 12 h          |             | 24 h          |             | 30 min                                     |             | 1 h           |             | 6 h           |             | 12 h          |             | 24 h          |             |
|               | Real Time PCR                              | Micro-array | Real Time PCR | Micro-array | Real Time PCR | Micro-array | Real Time PCR | Micro-array | Real Time PCR | Micro-array | Real Time PCR                              | Micro-array | Real Time PCR | Micro-array | Real Time PCR | Micro-array | Real Time PCR | Micro-array | Real Time PCR | Micro-array |
| CCL12/MCP5    | 18.1                                       | 19.7        | 27.8          | 27.7        | 15.3          | 19.3        | 18.3          | 19.6        | 25.3          | 29.2        | 6.5                                        | 7.5         | 11.3          | 12.5        | 7.2           | 8.6         | 6.5           | 15.0        | 15.2          | 14.9        |
| CCL2/MCP1     | 7.2                                        | 6.3         | 23.1          | 24.8        | 15.6          | 20.4        | 7.6           | 6.0         | 1.3           | 4.7         | 1.8                                        | 1.8         | 4.8           | 4.2         | 6.3           | 7.0         | 6.8           | 7.1         | 1.3           | 1.2         |
| CD14          | 8.1                                        | 9.6         | 22.3          | 20.3        | 12.3          | 10.9        | 7.5           | 8.6         | 2.6           | 3.4         | 4.3                                        | 3.7         | 11.3          | 14.6        | 7.8           | 7.7         | 4.5           | 5.9         | 2.4           | 3.4         |
| CSF2          | 7.2                                        | 6.3         | 58.6          | 70.5        | 44.6          | 65.8        | 12.8          | 12.5        | 1.4           | 1.3         | 1.3                                        | 1.2         | 38.2          | 75.8        | 49.9          | 20.4        | 106.9         | 1.5         | 24.3          |             |
| CXCL2/ MIP2   | 75.2                                       | 123.6       | 210.2         | 250.0       | 48.3          | 76.6        | 25.6          | 35.8        | 4.1           | 3.9         | 32.1                                       | 56.9        | 175.2         | 215.3       | 36.2          | 66.7        | 26.3          | 28.2        | 4.7           | 5.1         |
| H2-E $\alpha$ | 3.9                                        | 5.1         | 1.2           | ---         | 0.7           | ---         | 0.5           | ---         | 0.4           | ---         | 3.0                                        | ---         | 1.0           | ---         | 0.5           | ---         | 0.7           | ---         | 0.4           | ---         |
| IGH-4         | 12.9                                       | 38.9        | 0.5           | ---         | 0.3           | ---         | 0.2           | ---         | 0.4           | ---         | 3.0                                        | ---         | 0.9           | ---         | 0.6           | ---         | 0.7           | ---         | 1.1           | ---         |
| IHSF6         | 10.5                                       | 10.3        | 15.2          | 3.2         | 4.1           | 3.2         | 3.1           | 10.6        | 2.8           | 4.0         | 2.6                                        |             |               |             |               |             |               |             |               |             |
| IL-1 $\alpha$ | 5.1                                        | 4.9         | 9.8           | 11.2        | 1.6           | ---         | 1.6           | ---         | 1.3           | ---         | 1.3                                        | ---         | 1.9           | ---         | 1.32          | ---         | 0.8           | ---         | 0.9           | ---         |
| IL-6          | 99.1                                       | 171.3       | 202.1         | 362.0       | 70.0          | 97.7        | 7.94          | 25.5        | 2.28          | 5.2         | 30.2                                       | 36.3        | 140.6         | 176.1       | 20.9          | 38.6        | 20.5          | 14.5        | 2.9           | 5.2         |
| IRG1          | 486.3                                      | 286.0       | 2548.4        | 1858.4      | 370.5         | 552.0       | 208.9         | 313.0       | 63.2          | 53.0        | 64.6                                       | 29          | 2100.0        | 1082.0      | 332.4         | 304         | 170.8         | 183.5       | 73.3          | 64.1        |
| STAT4         | 3.6                                        | 6.8         | 3.0           | 5.1         | 0.8           | ---         | 0.7           | ---         | 0.8           | ---         | 1.5                                        | ---         | 1.8           | ---         | 0.7           | ---         | 0.6           | ---         | 0.7           | ---         |
| TNF $\alpha$  | 35.2                                       | 39.4        | 21.1          | 24.3        | 25.3          | 29.6        | 16.5          | 18.3        | 6.4           | 7.8         | 21.3                                       | 21.9        | 19.5          | 28.6        | 23.1          | 23.9        | 17.2          | 19.6        | 1.3           | ---         |

Values are the ratio of mean fold change of LPS treatment to vehicle control ( $n=3$ ).

Table 9. Differential expression of IRF3 regulated genes in lungs of *nrf2*-deficient and wild-type mice after LPS stimulus.

| Gene title                                                                            | Gene symbol    | 30 min          |                 | 1 h             |                 | 6 h             |                 | 12 h            |                 | 24 h            |                 |
|---------------------------------------------------------------------------------------|----------------|-----------------|-----------------|-----------------|-----------------|-----------------|-----------------|-----------------|-----------------|-----------------|-----------------|
|                                                                                       |                | (LPS / Vehicle) |                 | (LPS / Vehicle) |                 | (LPS / Vehicle) |                 | (LPS / Vehicle) |                 | LPS / Vehicle   |                 |
|                                                                                       |                | <i>Nrf2</i> -/- | <i>Nrf2</i> +/+ |
| Chemokine (C-X-C motif) ligand 10 (Gamma-IP10)                                        | CXCL10 (IP-10) | 14.7 ± 0.6      | 4.3 ± 0.5       | 40.5 ± 0.5      | 25.8 ± 0.4      | 187.4 ± 0.6     | 112.2 ± 0.4     | 40.2 ± 0.6      | 34.3 ± 0.4      | 5.0 ± 0.7       | 5.6 ± 0.4       |
| Chemokine (C-X-C motif) ligand 11 (Interferon-inducible T-cell alpha chemoattractant) | CXCL11 (ITAC)  | ---             | ---             | 3.9 ± 0.5       | ---             | 177.3 ± 0.5     | 198.1 ± 0.8     | 24.8 ± 0.5      | 41.6 ± 0.9      | ---             | ---             |
| Chemokine (C-X-C motif) ligand 9 (Gamma interferon induced monokine)                  | CXCL9 (MIG)    | 14.7 ± 0.5      | ---             | 11.7 ± 0.5      | ---             | 820.3 ± 0.5     | 576.0 ± 0.5     | 837.5 ± 0.5     | 739.3 ± 0.6     | 116.2 ± 0.7     | 68.6 ± 0.7      |
| Epstein-Barr virus induced gene 3                                                     | Ebi3           | ---             | ---             | 9.6 ± 0.4       | 12.2 ± 0.4      | 8.8 ± 0.4       | 6.2 ± 0.4       | 8.2 ± 0.4       | 6.7 ± 0.4       | 4.2 ± 0.5       | 4.0 ± 0.4       |
| Immune-responsive gene 1                                                              | IRG1           | 286.0 ± 0.6     | 1858 ± 0.4      | 552 ± 0.4       | 313 ± 0.4       | 53 ± 0.4        | 29 ± 0.8        | 1082 ± 0.4      | 304 ± 0.5       | 183.5 ± 0.7     | 64.1 ± 0.5      |
| Interferon activated gene 202B                                                        | IFI202B        | 2.5 ± 0.4       | ---             | 3.5 ± 0.5       | 1.9 ± 0.5       | 39.4 ± 0.4      | 21.0 ± 0.4      | 14.9 ± 0.4      | 8.7 ± 0.4       | 6.5 ± 0.4       | 4.8 ± 0.4       |
| Interferon activated gene 204                                                         | IFI204         | 4.3 ± 0.4       | ---             | 4.8 ± 0.7       | 1.9 ± 0.5       | 31.8 ± 0.4      | 29.9 ± 0.4      | 12 ± 0.5        | 9.4 ± 0.4       | 7.1 ± 0.5       | 3.7 ± 0.4       |
| Interferon regulatory factor 1                                                        | IRF1           | 5.7 ± 0.4       | 4.2 ± 0.4       | 4.5 ± 0.4       | 3.7 ± 0.4       | 4.9 ± 0.4       | 4.5 ± 0.4       | 2.5 ± 0.4       | 2.4 ± 0.4       | ---             | ---             |
| Interferon regulatory factor 5                                                        | IRF5           | 1.7 ± 0.4       | ---             | 2.4 ± 0.4       | 1.7 ± 0.4       | 3.8 ± 0.4       | 3.1 ± 0.4       | 2.5 ± 0.4       | 2.2 ± 0.4       | 2.2 ± 0.4       | 2.1 ± 0.4       |
| Interferon regulatory factor 7                                                        | IRF7           | ---             | ---             | 1.9 ± 0.4       | ---             | 22.6 ± 0.4      | 15.6 ± 0.4      | 16.3 ± 0.4      | 13.1 ± 0.4      | 7.7 ± 0.5       | 6.0 ± 0.4       |
| Interferon-induced protein 44                                                         | IFI44          | ---             | ---             | ---             | ---             | 17.9 ± 0.4      | 10.6 ± 0.4      | 6.6 ± 0.4       | 5.5 ± 0.4       | 3.1 ± 0.4       | 1.8 ± 0.4       |
| Interferon-induced protein with tetratricopeptide repeats 2 (ISG54)                   | IFIT2          | ---             | ---             | ---             | ---             | 39.9 ± 0.4      | 23.1 ± 0.4      | 11.8 ± 0.6      | 8.2 ± 0.5       | 2.5 ± 0.5       | 2.1 ± 0.4       |
| Interferon-induced protein with tetratricopeptide repeats 3 (GARG-49)                 | IFIT3          | ---             | ---             | ---             | ---             | 18.4 ± 0.4      | 9.9 ± 0.4       | 6.3 ± 0.4       | 5.8 ± 0.4       | 2.9 ± 0.5       | 2.4 ± 0.4       |
| Myxovirus (influenza virus) resistance 1                                              | Mx1            | ---             | ---             | ---             | 2.1 ± 0.5       | 49.9 ± 0.4      | 23.8 ± 0.4      | 6.9 ± 0.7       | 4.7 ± 0.4       | 2.1 ± 0.4       | 1.9 ± 0.5       |

Values are mean fold change ± SE; ---, No change or less than 1.5 fold.

Figure 1

Serum levels of p55 and p75 analyzed by ELISA (R & D Systems) in *nrf2*-deficient and wild-type mice after 6h of treatment with either vehicle and or LPS (1.5 mg/mouse). \* Differs from vehicle control of the same genotype;  $P < 0.05$ . ND, Not detected.

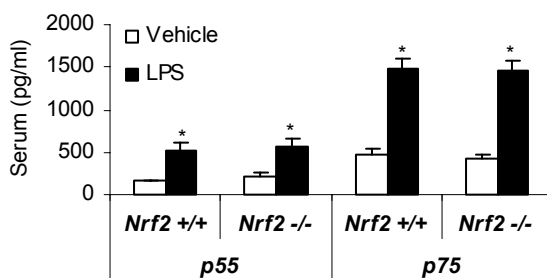

Figure 2

Constitutive protein levels of TLR4 (A) and CD14 (B) in whole cell extracts obtained from peritoneal macrophages of *nrf2*<sup>-/-</sup> and *nrf2*<sup>+/+</sup> mice by immunoblot analysis. Immunoblot analysis was performed as described in the methods section using antibodies specific for the TLR4 and CD14.

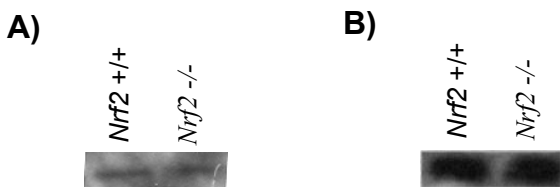

Figure 3 (A) DNA binding activity assay showed the increased binding of p65/Rel A subunit from the lung nuclear extracts obtained from LPS treated *nrf2* <sup>-/-</sup> mice to an NF- $\kappa$ B binding sequence compared with its wild-type counterpart. (B) In response to LPS or TNF- $\alpha$  treatment, nuclear extracts from *nrf2* <sup>-/-</sup> MEFs showed increased binding of p65/Rel A subunit to NF- $\kappa$ B binding sequence when compared to wild-type MEFs.

**A**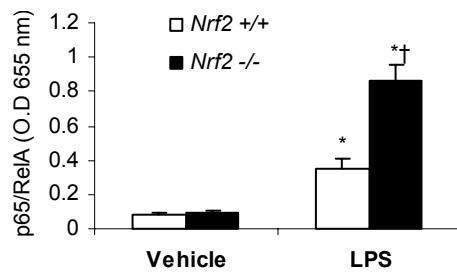**B**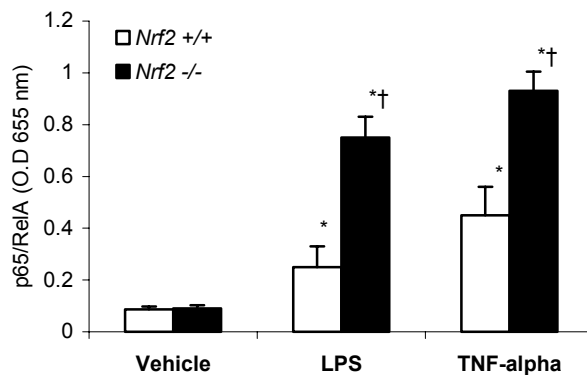

Supplement: JCI0625790sd.pdf [file JCI0625790sd.pdf]
